# Supplementary material
Source: HighWire-hosted journal article supplement (https://drc.bmj.com/content/suppl/2023/07/09/11.4.e003394)
Supplement: bmjdrc-2023-003394supp001_data_supplement.pdf [file bmjdrc-2023-003394supp001_data_supplement.pdf]

**Prevalence of fear of hypoglycemia in adults with type 1 diabetes using a newly developed screener and clinician's perspective on its implementation**

Megan E. Peter<sup>1</sup>, Nicole Rioles<sup>1</sup>, Jingwen Liu<sup>1</sup>, Katherine Chapman<sup>1</sup>, Wendy A. Wolf<sup>1</sup>, Huyen Nguyen<sup>1</sup>, Marina Basina<sup>2</sup>, Halis Kaan Akturk<sup>3</sup>, Osagie Ebekozien<sup>1</sup>, Magaly-Nieves Perez<sup>4</sup>, Jiat Ling Poon<sup>4</sup>, Beth Mitchell<sup>4\*</sup>

<sup>1</sup>T1D Exchange, Boston, MA, US, <sup>2</sup>Stanford Diabetes Research Center, Stanford, California, US, <sup>3</sup>University of Colorado, Aurora, CO, US, <sup>4</sup>Eli Lilly and Company, Indianapolis, IN, US

\*Corresponding Author:

Beth Mitchell

Eli Lilly and Company,

Lilly Corporate Center,

Indianapolis, IN 46285, USA

Email: mitchell\_beth\_d@lilly.com

**Supplementary Table 1: Questions used in focus group semi-structured interviews**

| Topic                                   | Questions used in the HCP interviews                                                                                                                                                                                                                                                                                                                                                                                                                                                                                                                                                                                                                                                                                                                                                                          |
|-----------------------------------------|---------------------------------------------------------------------------------------------------------------------------------------------------------------------------------------------------------------------------------------------------------------------------------------------------------------------------------------------------------------------------------------------------------------------------------------------------------------------------------------------------------------------------------------------------------------------------------------------------------------------------------------------------------------------------------------------------------------------------------------------------------------------------------------------------------------|
| Current psychosocial care               | <ul style="list-style-type: none"> <li>▪ How long have you been caring for adults with type 1 diabetes?</li> <li>▪ What are top psychosocial needs you see from your patients?</li> <li>▪ Do you have mental health care professionals within the clinic/health system?</li> <li>▪ How much time during a visit do you typically spend (if any) to discuss patient's psychosocial needs?</li> </ul>                                                                                                                                                                                                                                                                                                                                                                                                           |
| Value of screening for and treating FoH | <ul style="list-style-type: none"> <li>▪ What is your reaction to the survey results?</li> <li>▪ Do you currently assess participants for fear of hypoglycemia?</li> <li>▪ What do you believe are the primary health outcomes associated with FoH?</li> <li>▪ Do you believe other clinicians in your clinic would be interested in using the FoH screener? Why or why not?</li> </ul>                                                                                                                                                                                                                                                                                                                                                                                                                       |
| Implementing the FoH screener           | <ul style="list-style-type: none"> <li>▪ Can you describe what the clinic flow would look like to implement the screener at your clinic?</li> <li>▪ How confident are you that your clinic could successfully implement the screener?</li> <li>▪ What are barriers to adopting FoH screener at your clinic?</li> <li>▪ Do you think the FoH screener will be effective at your clinic?</li> <li>▪ How do you manage your patients for fear of hypoglycemia?</li> <li>▪ Are the screener scores enough for you to make treatment decisions? Or do you prefer to see clinical recommendations based on the scores?</li> <li>▪ Do you feel your clinic has sufficient resources for intervention if a patient scores high for FoH?</li> <li>▪ How often do you think a patient should be screened for</li> </ul> |

|  |                                                                                                                                                                    |
|--|--------------------------------------------------------------------------------------------------------------------------------------------------------------------|
|  | <p>FoH?</p> <ul style="list-style-type: none"><li>▪ If resource is limited, what types of patients do you think should be prioritized for FoH screening?</li></ul> |
|--|--------------------------------------------------------------------------------------------------------------------------------------------------------------------|

Abbreviations: FoH, fear of hypoglycemia; HCP, healthcare provider

**Supplementary Table 2: Domains and Themes from Focus Group**

| <b>Domain</b>                                            | <b>Theme</b>                               | <b>Theme Description</b>                                                                                                                                                            | <b>N</b> |
|----------------------------------------------------------|--------------------------------------------|-------------------------------------------------------------------------------------------------------------------------------------------------------------------------------------|----------|
| 1: Psychosocial needs, care, and communication           | 1. Psychosocial needs of patients          | Common psychosocial problems seen in adult patients with type 1 diabetes.                                                                                                           | 32       |
|                                                          | 2. Mental healthcare                       | Mental healthcare providers within the clinic/healthcare system, referring patients to mental healthcare providers, and assessing patient progress after referral to mental health. | 51       |
|                                                          | 3. Psychosocial communication              | How HCPs discuss psychosocial issues with patients, including the amount of time spent during clinic visits discussing psychosocial needs.                                          | 60       |
| 2: FoH patterns, assessment, and management              | 4. Current method for assessing FoH        | Current method(s) HCPs use to assess FoH in patients.                                                                                                                               | 19       |
|                                                          | 5. Patterns of FoH in clinical practice    | Patterns of FoH seen in clinical practice, including which patients tend to have FoH.                                                                                               | 20       |
|                                                          | 6. Health outcomes associated with FoH     | Perceived health outcomes associated with fear of hypoglycemia.                                                                                                                     | 14       |
|                                                          | 7. Managing FoH                            | Methods providers use to manage fear of hypoglycemia in patients.                                                                                                                   | 30       |
| 3: Screener survey results, interest, and implementation | 8. Reaction to survey results              | General reaction to the survey results as presented in the one-page handout summary.                                                                                                | 13       |
|                                                          | 9. Interest in screener                    | Overall interest in implementing the screener into their practice.                                                                                                                  | 16       |
|                                                          | 10. Implementing screener                  | Implementation barriers, suggestions, patients to prioritize, and whether screener results would influence treatment decisions.                                                     | 106      |
| 4: Unprompted comments on resources and devices          | 11. Unprompted comments about devices      | Comments about diabetes-specific technology and devices, including their drawbacks.                                                                                                 | 11       |
|                                                          | 12. Unprompted Clinic resources and access | Resources in clinic (or desired/necessary resources) for patients with type 1 diabetes, and comments regarding access to specialized care.                                          | 14       |

Abbreviations: FoH, fear of hypoglycemia; HCP, healthcare provider; N, number of instances when the specific theme was discussed in the focus group interviews.

**Supplementary Table 3: Descriptive statistics of FoH screener scores**

| Scale or subscale                | Score range | N (%)     |
|----------------------------------|-------------|-----------|
| Total score ( $\alpha=0.88$ )    |             |           |
| Low FoH total                    | 9 – 30      | 387 (70%) |
| High FoH total                   | 31 – 44     | 166 (30%) |
| Worry score ( $\alpha=0.90$ )    |             |           |
| Low FoH worry                    | 6 – 23      | 418 (76%) |
| High FoH worry                   | 24 – 30     | 135 (24%) |
| Behavior score ( $\alpha=0.71$ ) |             |           |
| Low FoH behavior                 | 3 – 9       | 398 (72%) |
| High FoH behavior                | 10 – 15     | 155 (28%) |

Abbreviations: FoH, fear of hypoglycemia; N, total number of participants

Note:  $\alpha$ =Cronbach's alpha

**Supplementary Table 4: Multiple regressions predicting diabetes and psychosocial outcomes from binary FoH screener total and domain (worry and behavior) scores**

| Outcome variables                                      | High FoH (domain scores)           |                                                 |                                       |                                          |                                                         |
|--------------------------------------------------------|------------------------------------|-------------------------------------------------|---------------------------------------|------------------------------------------|---------------------------------------------------------|
|                                                        | B<br>(Total<br>score) <sup>a</sup> | R <sup>2</sup><br>(Total<br>score) <sup>a</sup> | B<br>(Worry<br>subscale) <sup>a</sup> | B<br>(Behavior<br>subscale) <sup>a</sup> | R <sup>2</sup><br>(Doma<br>in<br>score)<br><sup>a</sup> |
| Self-reported A1c (%)                                  | 0.56***                            | 0.11                                            | 0.11                                  | 0.54***                                  | 0.11                                                    |
| Number of<br>comorbidities                             | 1.08***                            | 0.18                                            | 0.71***                               | 0.50*                                    | 0.16                                                    |
| Comfortable blood<br>glucose range – low <sup>#</sup>  | 5.31**                             | 0.03                                            | 3.17                                  | 1.57                                     | 0.02                                                    |
| Comfortable blood<br>glucose range – high <sup>#</sup> | 6.06                               | 0.01                                            | -1.95                                 | 15.49***                                 | 0.03                                                    |
| Depression (PHQ-8)                                     | 0.45***                            | 0.15                                            | 0.27***                               | 0.30***                                  | 0.15                                                    |
| Anxiety (GAD-7)                                        | 0.52***                            | 0.16                                            | 0.35***                               | 0.35***                                  | 0.17                                                    |

Abbreviations: A1c, glycated hemoglobin; FoH, fear of hypoglycemia; HFS, Hypoglycemia Fear Survey; GAD-7, Generalized Anxiety Disorder-7; PHQ-8, Patient Health Questionnaire-8; T1D, type 1 diabetes. Note: \*\*\* p<0.001, \*\* p<0.01, \* p<0.05; <sup>#</sup> Participants' comfortable blood glucose range [70 mg/dL (low) and 180 mg/dL (high)]; B=Unstandardized Regression Coefficient (indicates the difference in each outcome variable between participants who reported high FoH score (>30) and participants who reported low FoH score (≤30)); R<sup>2</sup>Coefficient of determination.

<sup>a</sup> Each outcome variable was entered into two linear regression models: i) with High total FoH (being 1 if total FoH score>30) as an independent variable; ii) with High FoH worry (being 1 if worry score>23) and High FoH behavior (being 1 if behavior score>9) as independent variables. All models controlled for age, gender, body mass index, duration of T1D, pump use, and continuous glucose monitor use.
